# Supplementary material
Source: Springer Nature journal article supplement (https://www.springerprofessional.de/resource/supplementary/13638_2014_1077_MOESM27_ESM.pdf/11899032)

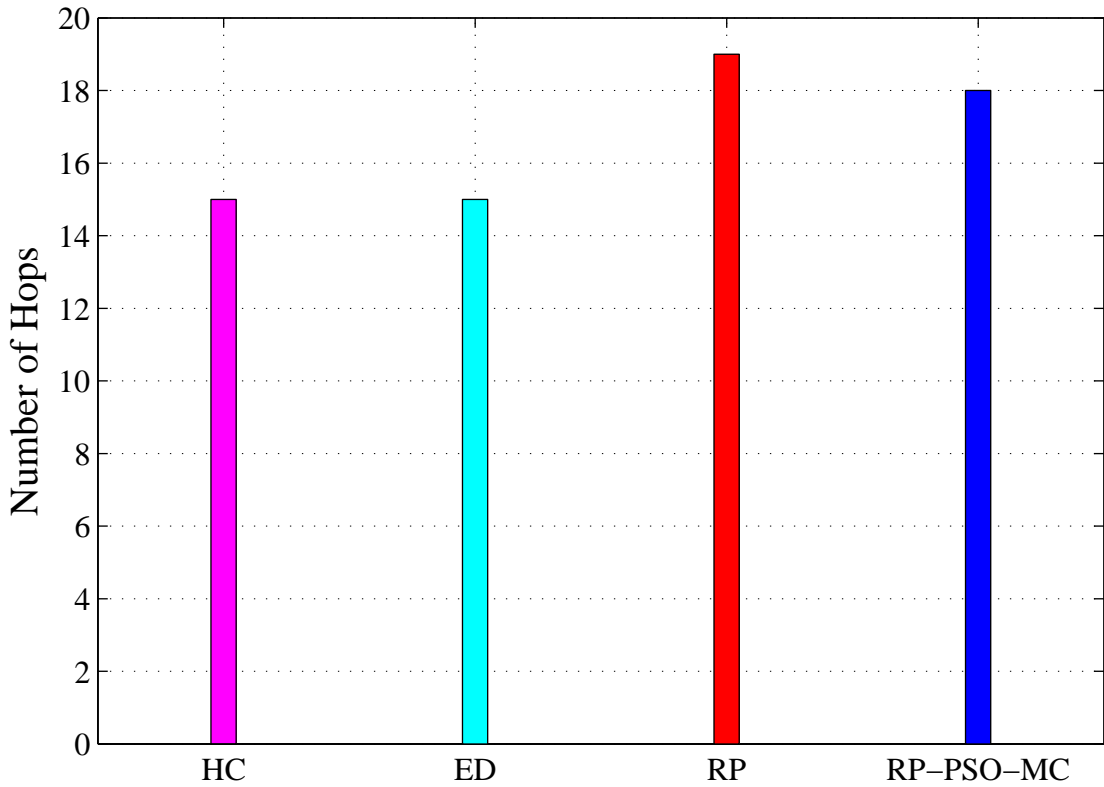

Supplement: MOESM27 [file 11899032]
